# Supplementary material for: Prevalence and clinical implications of subretinal fluid in retinal diseases: a real-world cohort study
Source: HighWire-hosted journal article supplement (doi:10.1136/bmjophth-2022-001214), 2023-02-01
Supplement: bmjophth-2022-001214supp001_data_supplement.pdf [file bmjophth-2022-001214supp001_data_supplement.pdf]

**Supplemental Table 1. Incidence of Secondary Treatments in Diabetic Macular Edema and Retinal Vein Occlusion over 24 Months**

| Secondary Treatment                    | DME          |            |                | RVO          |            |                |
|----------------------------------------|--------------|------------|----------------|--------------|------------|----------------|
|                                        | Total (n, %) | SRF (n, %) | Non-SRF (n, %) | Total (n, %) | SRF (n, %) | Non-SRF (n, %) |
| Intravitreal corticosteroid injections | 4/122 (3%)   | 0/31 (0%)  | 4/95 (4%)      | 2/54 (4%)    | 0/22 (0%)  | 2/32 (6%)      |
| Panretinal photocoagulation            | 13/122 (11%) | 3/27 (11%) | 10/95 (11%)    | 3/54 (6%)    | 1/22 (5%)  | 2/32 (6%)      |
| Pars plana vitrectomy                  | 5/122 (4%)   | 1/31 (3%)  | 4/95 (4%)      | 2/54 (4%)    | 1/22 (5%)  | 1/32 (3%)      |

DME = diabetic macular edema; RVO = retinal vein occlusion
